# Supplementary material for: Synthesis of Bi-Metallic-Sulphides/MOF-5@graphene Oxide Nanocomposites for the Removal of Hazardous Moxifloxacin
Source: MDPI journal article supplement (doi:10.3390/catal13060984), 2023-06-08
Supplement: s1 [file s1]

## Supporting Information

### Synthesis of bi-metallic-sulphides/MOF-5@graphene oxide nanocomposites for the removal of hazardous Moxifloxacin

Aqsa Anum<sup>1</sup>, Muhammad Altaf Nazir<sup>1</sup>, Sobhy M. Ibrahim<sup>2</sup>, Syed Shoaib Ahmad Shah<sup>3</sup>, Asif A. Tahir<sup>4</sup>, Misbah Malik<sup>1</sup>, Muhammad Ahmad Wattoo<sup>5</sup> and Aziz ur Rehman<sup>\*1</sup>

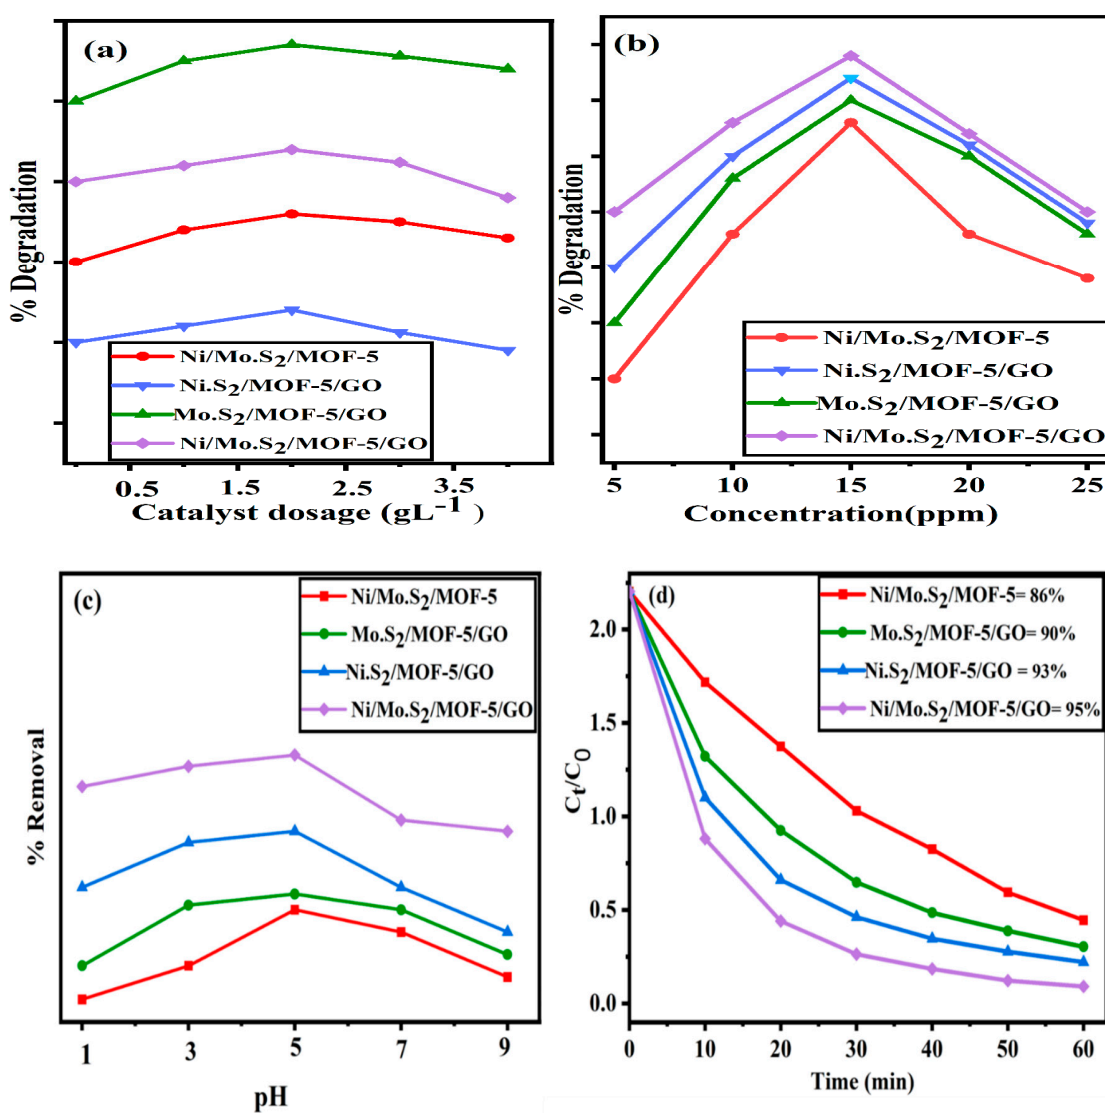

**Figure S1.** Optimization of reaction parameters using Ni/Mo.S<sub>2</sub>/MOF-5/GO, Ni.S<sub>2</sub>/MOF-5/GO, Mo.S<sub>2</sub>/MOF-5/GO, Ni/Mo.S<sub>2</sub>/MOF-5 (a) MOX concentration, (b) photocatalyst dosage (c) Effect of pH of on degradation of moxifloxacin (d) MOX degradation by all catalysts as a function of time under sunlight irradiation.

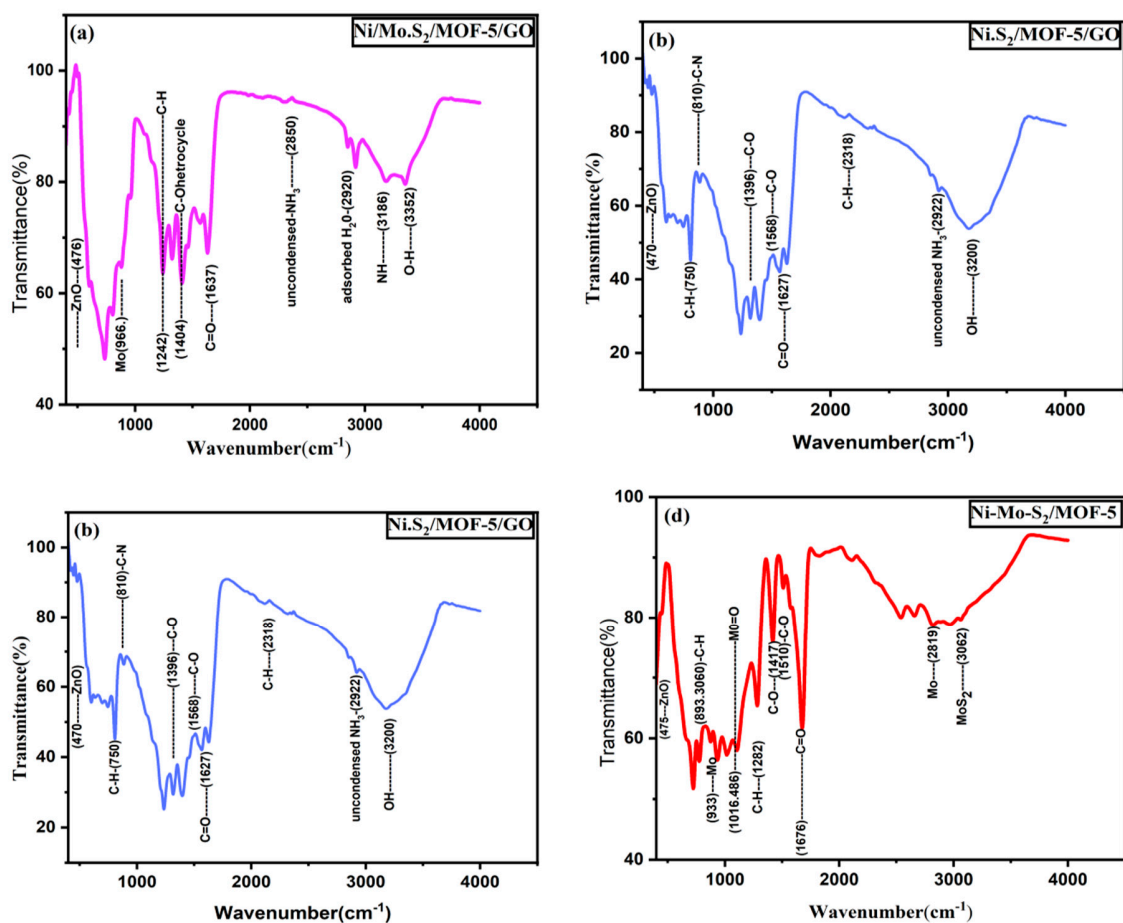

**Figure S2.** Fourier transform infrared (FTIR) spectra of sample (a)Ni/Mo.S<sub>2</sub>/MOF-5/GO, (b) NiS<sub>2</sub>/MOF-5/GO, (c) Mo.S<sub>2</sub>/MOF-5/GO, (d)Ni/Mo.S<sub>2</sub>/MOF-5 nanocomposites of the used catalysts after cycling to verify their structural stability.
